# Supplementary material for: Residue Analysis and Risk Exposure Assessment of Multiple Pesticides in Tomato and Strawberry and Their Products from Markets
Source: MDPI journal article supplement (doi:10.3390/foods12101936), 2023-05-10
Supplement: s1 [file s1]

Supplementary materials:

# Residue Analysis and Risk Exposure Assessment of Multiple Pesticides in Tomato and Strawberry and Their Products from Markets

El-Sayed A. El-Sheikh <sup>1,\*</sup>, Dongyang Li <sup>2,3</sup>, Ibrahim Hamed <sup>1</sup>, Mohamed-Bassem Ashour <sup>1</sup> and Bruce D. Hammock <sup>3,\*</sup>

<sup>1</sup> Plant Protection Department, Faculty of Agriculture, Zagazig University, Zagazig 44511, Al-Sharkia, Egypt

<sup>2</sup> Laboratory of Agricultural Information Intelligent Sensing, College of Biosystems Engineering and Food Science, Zhejiang University, Hangzhou 310058, China

<sup>3</sup> Department of Entomology and Nematology, and UCD Comprehensive Cancer Center, University of California, Davis, CA 95616, USA

\* Correspondence: eaelsheikh@zu.edu.eg (E.-S.A.E.-S.); bdhammock@ucdavis.edu (B.D.H.)

Table S1. Characteristics of pyrethroid insecticides.

| No | Active substance   | CAS-No     | Structure                                                                           | Molecular weight<br>(g mol <sup>-1</sup> ) | Physical state | Melting point/range<br>(°C) | Chemical stability |
|----|--------------------|------------|-------------------------------------------------------------------------------------|--------------------------------------------|----------------|-----------------------------|--------------------|
| 1. | Bifenthrin         | 82657-04-3 | 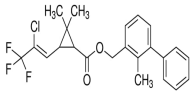 | 422.87                                     | powder         | 66-71                       | Stable under RT *  |
| 2. | cypermethrin       | 52315-07-8 |  | 416.30                                     | semi-solid     | 65-74                       | Stable under RT    |
| 3. | deltamethrin       | 52918-63-5 |  | 505.20                                     | crystals       | 98-103                      | Stable under RT    |
| 4. | esfenvalerate      | 66230-04-4 |  | 419.90                                     | powder         | 58-64                       | Stable under RT    |
| 5. | permethrin         | 52645-53-1 |  | 391.29                                     | solid          | 34-35                       | Stable under RT    |
| 6. | lambda-cyhalothrin | 91465-08-6 |  | 449.85                                     | solid          | 49.2                        | Stable under RT    |
| 7. | fenvalerate        | 51630-58-1 |  | 419.9                                      | solid          | 59-63                       | Stable under RT    |

\* RT= room temperature.

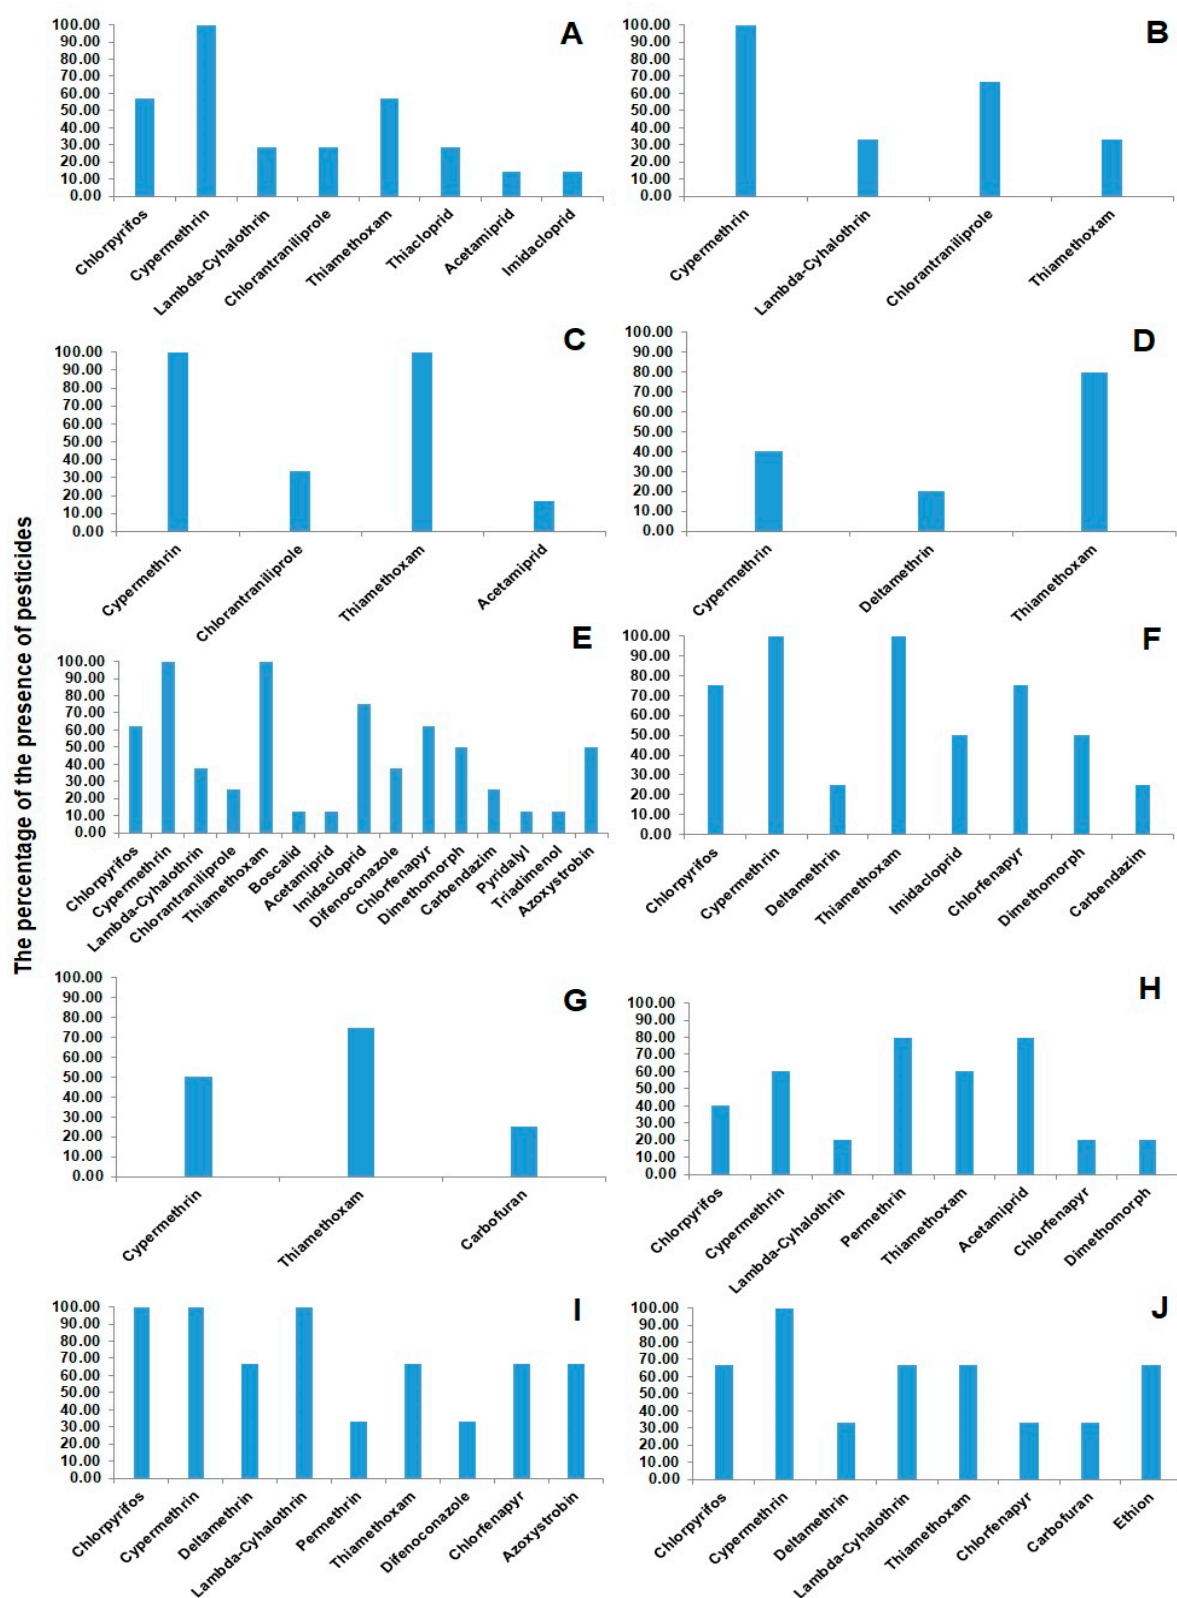

**Figure S1.** The percentages of the presence of pesticides in tomato and strawberry and their products from supermarkets. Strawberry yogurt (A), strawberry juice (B), strawberry jam (C), dried strawberry (D), tomato sauce (E), tomato ketchup (F), tomato juice (G), dried tomato (H), tomato samples (I), and strawberry samples (J).

**Table S2:** Lower and higher daily consumption rate of strawberry yogurt, strawberry juice, and tomato juice.

| Samples           | Consumption (Kg) |        |
|-------------------|------------------|--------|
|                   | Lower            | Higher |
| Strawberry yogurt | 0.100            | 0.38   |
| Strawberry juice  | 0.200            | 0.235  |
| Tomato Juice      | 0.200            | 0.200  |

**Table S3:** ESTI and NEDI for pesticide residues detected in strawberry yogurt, strawberry juice, and tomato juice.

| Samples           | Pesticides          | Residue (mg Kg <sup>-1</sup> ) |         | ESTI<br>(mg kg <sup>-1</sup> day) | NEDI<br>(mg kg <sup>-1</sup> day) |
|-------------------|---------------------|--------------------------------|---------|-----------------------------------|-----------------------------------|
|                   |                     | max                            | Average |                                   |                                   |
| Strawberry yogurt | Chlorpyrifos        | 0.022                          | 0.014   | 0.000186                          | 0.000031                          |
|                   | Cypermethrin        | 0.368                          | 0.1915  | 0.003108                          | 0.000426                          |
|                   | Lambda-Cyhalothrin  | 0.174                          | 0.099   | 0.001469                          | 0.000220                          |
|                   | Chlorantraniliprole | 0.013                          | 0.012   | 0.000110                          | 0.000027                          |
|                   | Thiamethoxam        | 0.046                          | 0.027   | 0.000388                          | 0.000060                          |
|                   | Thiacloprid         | 0.124                          | 0.0745  | 0.001047                          | 0.000166                          |
|                   | Acetamiprid         | 0.019                          | 0.019   | 0.000160                          | 0.000042                          |
|                   | Imidacloprid        | 0.014                          | 0.014   | 0.000118                          | 0.000031                          |
| Strawberry juice  | Cypermethrin        | 0.096                          | 0.064   | 0.000501                          | 0.000284                          |
|                   | Lambda-Cyhalothrin  | 0.011                          | 0.011   | 0.000057                          | 0.000049                          |
|                   | Chlorantraniliprole | 0.126                          | 0.0685  | 0.000658                          | 0.000304                          |
|                   | Thiamethoxam        | 0.024                          | 0.024   | 0.000125                          | 0.000107                          |
| Tomato Juice      | Cypermethrin        | 0.067                          | 0.067   | 0.000298                          | 0.000298                          |
|                   | Thiamethoxam        | 0.013                          | 0.013   | 0.000058                          | 0.000058                          |
|                   | Carbofuran          | 0.008                          | 0.008   | 0.000036                          | 0.000036                          |
